# Supplementary material
Source: PubMed Central journal article supplement (PMC7133133)
Supplement: CJN.11881019SupplementaryData.pdf [file CJN.11881019SupplementaryData.pdf]

## **Supplemental Material Table of Contents**

**Supplemental Table 1A. Association between diastolic BP parameters and LVH (in cross-section) in unadjusted and adjusted analyses, along with model discrimination**

**Supplemental Table 1B. Association between diastolic BP parameters and ESKD and in unadjusted and adjusted analyses, along with model discrimination**

**Supplemental Table 2. Association between systolic BP parameters and risk of LVH during two-year follow-up, along with model discrimination**

**Supplemental Table 3A. Association between systolic BP parameters and LVH in unadjusted and adjusted analyses using BP load as a categorical predictor along with model discrimination**

**Supplemental Table 3B. Association between systolic BP parameters and ESKD in unadjusted and adjusted analyses using BP load as a categorical predictor along with model discrimination**

**Supplemental Table 1A.** Association between diastolic BP parameters and LVH (in cross-section) in unadjusted and adjusted analyses, along with model discrimination.<sup>a</sup>

| <b>Diastolic BP Metric<br/>N=533</b>                  | <b>Unadjusted<br/>OR<sup>c</sup><br/>(95% CI)</b> | <b>Unadjusted C-<br/>statistic<br/>(95% CI)</b> | <b>Adjusted OR<sup>a, c</sup><br/>(95% CI)</b> | <b>Adjusted C-<br/>statistic<br/>(95% CI)</b> |
|-------------------------------------------------------|---------------------------------------------------|-------------------------------------------------|------------------------------------------------|-----------------------------------------------|
| Awake diastolic BP load<br>(every 10% higher)         | 1.1 (1.0-1.2)                                     | 0.59 <sup>b</sup> (0.51-0.66)                   | 1.1 (1.0-1.3)                                  | 0.77 <sup>b</sup> (0.71-0.83)                 |
| Awake diastolic BP Index<br>(every 0.1 higher)        | 1.3 (1.0-1.7)                                     | 0.59 (0.51-0.66)                                | 1.4 (1.1-1.9)                                  | 0.78 (0.72-0.83)                              |
| Awake diastolic BP load +<br>Awake diastolic BP index | 1.0 (0.7-1.3)<br>1.4 (0.7-2.5)                    | 0.59 (0.51-0.66)                                | 0.8 (0.6-1.1)<br>2.1 (1.0-4.2)                 | 0.78 (0.72-0.84)                              |
| Sleep diastolic BP load<br>(every 10% higher)         | 1.1 (1.0-1.2)                                     | 0.57 <sup>b</sup> (0.50-0.65)                   | 1.1 (1.0-1.2)                                  | 0.77 <sup>b</sup> (0.71-0.82)                 |
| Sleep diastolic BP index<br>(every 0.1 higher)        | 1.2 (1.0-1.5)                                     | 0.58 (0.50-0.65)                                | 1.2 (1.0-1.6)                                  | 0.77 (0.71-0.83)                              |
| Sleep diastolic BP load +<br>Sleep diastolic BP Index | 1.0 (0.8-1.3)<br>1.2 (0.7-2.1)                    | 0.58 (0.50-0.65)                                | 1.0 (0.7-1.3)<br>1.4 (0.7-2.6)                 | 0.77 (0.71-0.83)                              |

<sup>a</sup> Adjusted for age, sex, race, cause of CKD, BMI z-score, urine protein/creatinine ratio, anti-hypertensive use, and baseline eGFR (by bedside Schwartz), N=515 included due to missing covariates

<sup>b</sup> Reference group for awake or sleep c-statistic comparisons

<sup>c</sup> OR = odds ratio, for every 0.1 higher systolic BP index or 10% higher SBP load

**Supplemental Table 1B.** Association between diastolic BP parameters and ESKD and in unadjusted and adjusted analyses, along with model discrimination.<sup>a</sup>

| <b>Metric</b><br>N=533                                | <b>Unadjusted<br/>HR<sup>c</sup></b><br>(95% CI) | <b>Unadjusted<br/>C-statistic</b><br>(95% CI) | <b>Adjusted HR<sup>a, c</sup></b><br>(95% CI) | <b>Adjusted<br/>C-statistic</b><br>(95% CI) |
|-------------------------------------------------------|--------------------------------------------------|-----------------------------------------------|-----------------------------------------------|---------------------------------------------|
| Awake diastolic BP load<br>(per 10% higher)           | 1.1 (1.1-1.2)                                    | 0.58 <sup>b</sup> (0.53-0.64)                 | 1.0 (1.0-1.1)                                 | 0.88 <sup>b</sup> (0.86-0.91)               |
| Awake diastolic BP index<br>(every 0.1 higher)        | 1.3 (1.1-1.6)                                    | 0.59 (0.53-0.64)                              | 1.1 (1.0-1.3)                                 | 0.88 (0.85-0.91)                            |
| Awake diastolic BP load +<br>Wake diastolic BP index  | 1.1 (0.9-1.3)<br>1.1 (0.7-1.6)                   | 0.58 (0.52-0.64)                              | 0.9 (0.7-1.0)<br>1.5 (1.0-2.3)                | 0.89 (0.86-0.91)                            |
| Sleep diastolic BP load<br>(per 10% higher)           | 1.1 (1.0-1.2)                                    | 0.57 <sup>b</sup> (0.51-0.63)                 | 1.0 (1.0-1.0)                                 | 0.88 <sup>b</sup> (0.85-0.91)               |
| Sleep diastolic BP index<br>(every 0.1 higher)        | 1.3 (1.1-1.4)                                    | 0.57 (0.51-0.63)                              | 1.1 (0.9 -1.3)                                | 0.88 (0.85-0.91)                            |
| Sleep diastolic BP load +<br>Sleep diastolic BP index | 1.0 (0.9-1.2)<br>1.1 (0.8-1.6)                   | 0.57 (0.50-0.63)                              | 0.8 (0.7-1.0)<br>1.7 (1.1-2.7)                | 0.89 (0.85-0.91)                            |

<sup>a</sup> Adjusted for age, sex, race, cause of CKD, BMI z-score, urine protein/creatinine ratio, anti-hypertensive use, and baseline eGFR (by bedside Schwartz), N=515 included due to missing covariates

<sup>b</sup> Reference group for awake or sleep c-statistic comparisons

<sup>c</sup> HR = hazard ratio, reported for every 0.1 higher in systolic BP index or 10% higher SBP load

**Supplemental Table 2.** Association between systolic BP parameters and risk of LVH during two-year follow-up, along with model discrimination.

| <b>Systolic BP Metrics</b><br>N=533                 | <b>Unadjusted OR<sup>c</sup></b><br>(95% CI) | <b>Unadjusted C-statistic</b><br>(95% CI) | <b>Adjusted OR<sup>a, c</sup></b><br>(95% CI) | <b>Adjusted C-statistic</b><br>(95% CI) |
|-----------------------------------------------------|----------------------------------------------|-------------------------------------------|-----------------------------------------------|-----------------------------------------|
| Awake systolic BP load<br>(every 10% higher)        | 1.3 (1.1-1.5)                                | 0.61 <sup>b</sup> (0.54-0.67)             | 1.2 (1.0-1.4)                                 | 0.77 <sup>b</sup> (0.72-0.82)           |
| Awake systolic BP Index<br>(every 0.1 higher)       | 2.1 (1.3-3.4)                                | 0.62 (0.56-0.68)                          | 1.9 (1.2-2.9)                                 | 0.78 (0.73-0.83)                        |
| Awake systolic BP load +<br>Awake systolic BP index | 1.1 (0.8-1.6)<br>1.6 (0.6-4.6)               | 0.62 (0.55-0.68)                          | 1.0 (0.7-1.4)<br>1.7 (0.6-4.6)                | 0.78 (0.73-0.83)                        |
| Sleep systolic BP load<br>(every 10% higher)        | 1.2 (1.1-1.4)                                | 0.63 <sup>b</sup> (0.57-0.69)             | 1.2 (1.0-1.3)                                 | 0.78 <sup>b</sup> (0.73-0.83)           |
| Sleep systolic BP index<br>(every 0.1 higher)       | 1.9 (1.2-2.9)                                | 0.63 (0.56-0.69)                          | 1.6 (1.1-2.3)                                 | 0.77 (0.72-0.83)                        |
| Sleep systolic BP load +<br>Sleep systolic BP Index | 1.2 (0.9-1.5)<br>1.3 (0.6-2.9)               | 0.62 (0.56-0.69)                          | 1.1 (0.9-1.5)<br>1.1 (0.5-2.4)                | 0.78 (0.73-0.83)                        |

<sup>a</sup> Adjusted for age, sex, race, cause of CKD, BMI z-score, urine protein/creatinine ratio, anti-hypertensive use, and baseline eGFR (by bedside Schwartz).

<sup>b</sup> Reference group for awake or sleep c-statistic comparisons

<sup>c</sup> OR = odds ratio, odds ratio, for every 0.1 higher systolic BP index or 10% higher SBP load

**Supplemental Table 3A.** Association between systolic BP parameters and LVH in unadjusted and adjusted analyses using BP load as a categorical predictor along with model discrimination.<sup>a</sup>

| <b>Systolic BP Metrics<br/>N=533</b>                                                                         | <b>Unadjusted OR<sup>c</sup><br/>(95% CI)</b>                | <b>Unadjusted C-<br/>statistic<br/>(95% CI)</b> | <b>Adjusted OR<sup>a,c</sup><br/>(95% CI)</b>                | <b>Adjusted C-<br/>statistic<br/>(95% CI)</b> |
|--------------------------------------------------------------------------------------------------------------|--------------------------------------------------------------|-------------------------------------------------|--------------------------------------------------------------|-----------------------------------------------|
| Awake Systolic BP<br>0-<25%<br>25-<50%<br>50-100%                                                            | Reference<br>1.6 (0.8-3.2)<br>2.1 (1.1-4.0)                  | 0.57 <sup>b</sup> (0.51-0.64)                   | Reference<br>1.6 (0.8-3.4)<br>2.0 (0.9-4.4)                  | 0.77 <sup>b</sup> (0.71-0.83)                 |
| Awake systolic BP Index<br>(every 0.1 higher)                                                                | 1.7 (1.2-2.3)                                                | 0.62 (0.55-0.69)                                | 1.6 (1.1-2.3)                                                | 0.78 (0.73-0.83)                              |
| Awake systolic BP load<br>0-<25%<br>25-<50%<br>50-100%<br>+<br>Awake systolic BP index<br>(every 0.1 higher) | Reference<br>0.9 (0.4-2.0)<br>0.7 (0.2-2.1)<br>2.0 (1.1-3.5) | 0.62 (0.55-0.69)                                | Reference<br>1.0 (0.4-2.4)<br>0.8 (0.2-2.9)<br>1.8 (0.9-3.4) | 0.78 (0.73-0.84)                              |
| Sleep systolic BP load<br>0-<25%<br>25-<50%<br>50-100%                                                       | Reference<br>1.9 (0.9-3.7)<br>1.9 (1.0-3.7)                  | 0.58 <sup>b</sup> (0.51-0.65)                   | Reference<br>1.9 (0.9-3.9)<br>1.7 (0.8-3.5)                  | 0.77 <sup>b</sup> (0.72-0.83)                 |
| Sleep systolic BP index<br>(every 0.1 higher)                                                                | 1.5 (1.1-2.0)                                                | 0.63 (0.56-0.70)                                | 1.5 (1.1-2.0)                                                | 0.78 (0.72-0.83)                              |
| Sleep systolic BP load<br>0-<25%<br>25-<50%<br>50-100%<br>+<br>Sleep systolic BP Index<br>(every 0.1 higher) | Reference<br>1.1 (0.5-2.6)<br>0.7 (0.2-2.3)<br>1.6 (1.0-2.7) | 0.63 (0.56-0.70)                                | Reference<br>1.1 (0.5-2.8)<br>0.7 (0.2-2.3)<br>1.7 (0.9-2.9) | 0.78 (0.72-0.84)                              |

<sup>a</sup> Adjusted for age, sex, race, cause of CKD, BMI z-score, urine protein/creatinine ratio, anti-hypertensive use, and baseline eGFR (by bedside Schwartz), N=515 included due to missing covariates

<sup>b</sup> Reference group for all c-statistic comparisons of models for awake or sleep parameters

<sup>c</sup> OR = odds ratio, for every 0.1 higher systolic BP index or higher BP load category

**Supplementary Table 3B.** Association between systolic BP parameters and ESKD in unadjusted and adjusted analyses using BP load as a categorical predictor along with model discrimination.<sup>a</sup>

| <b>Systolic BP Metrics<br/>N=533</b>                                                   | <b>Unadjusted HR<sup>c</sup><br/>(95% CI)</b>                | <b>Unadjusted C-<br/>statistic<br/>(95% CI)</b> | <b>Adjusted HR<sup>a, c</sup><br/>(95% CI)</b>               | <b>Adjusted C-<br/>statistic<br/>(95% CI)</b> |
|----------------------------------------------------------------------------------------|--------------------------------------------------------------|-------------------------------------------------|--------------------------------------------------------------|-----------------------------------------------|
| Awake Systolic BP<br>0-<25%<br>25-<50%<br>50-100%                                      | Reference<br>1.9 (1.2-3.0)<br>2.5 (1.6-3.8)                  | 0.59 <sup>b</sup> (0.54-0.63)                   | Reference<br>1.5 (0.9-2.3)<br>1.5 (0.9-2.4)                  | 0.89 <sup>b</sup> (0.85-0.91)                 |
| Awake systolic BP Index<br>(every 0.1 higher)                                          | 1.6 (1.3-1.9)                                                | 0.60 (0.55-0.65)                                | 1.3 (1.0-1.5)                                                | 0.89 (0.86-0.91)                              |
| Awake systolic BP load<br>0-<25%<br>25-<50%<br>50-100%<br>+<br>Awake systolic BP index | Reference<br>1.5 (0.8-2.6)<br>1.6 (0.7-3.3)<br>1.3 (0.9-1.9) | 0.60 (0.55-0.66)                                | Reference<br>1.1 (0.6-2.1)<br>1.0 (0.4-2.2)<br>1.2 (0.9-1.8) | 0.89 (0.86-0.91)                              |
| Sleep systolic BP load<br>0-<25%<br>25-<50%<br>50-100%                                 | Reference<br>1.3 (0.8-2.1)<br>2.1 (1.4-3.1)                  | 0.58 <sup>b</sup> (0.52-0.61)                   | Reference<br>1.3 (0.8-2.2)<br>1.4 (0.9-2.3)                  | 0.88 <sup>b</sup> (0.85-0.91)                 |
| Sleep systolic BP index<br>(every 0.1 increase)                                        | 1.4 (1.1-1.6)                                                | 0.57 (0.52-0.63)                                | 1.2 (1.0-1.4)                                                | 0.89 (0.85-0.91)                              |
| Sleep systolic BP load<br>0-<25%<br>25-<50%<br>50-100%<br>+<br>Sleep systolic BP Index | Reference<br>1.1 (0.6-1.9)<br>1.4 (0.7-2.9)<br>1.2 (0.9-1.7) | 0.58 (0.53-0.63)                                | Reference<br>1.2 (0.7-2.3)<br>1.2 (0.6-2.8)<br>1.1 (0.8-1.5) | 0.89 (0.85-0.91)                              |

<sup>a</sup> Adjusted for age, sex, race, cause of CKD, BMI z-score, urine protein/creatinine ratio, anti-hypertensive use, and baseline eGFR (by bedside Schwartz), N=515 included due to missing covariates

<sup>b</sup> Reference group for all c-statistic comparisons of models for awake or sleep parameters

<sup>c</sup> HR = hazard ratio, for every 0.1 higher systolic BP index or higher BP load category
